# Supplementary material for: Graphene/polyaniline@carbon cloth composite as a high-performance flexible supercapacitor electrode prepared by a one-step electrochemical co-deposition method
Source: Royal Society of Chemistry journal article supplement (doi:10.1039/c6ra27545a), 2017-01-01
Supplement: c6ra27545a1.pdf [file c6ra27545a1.pdf]

## Supporting Information

**One-step      Electrochemical      Co-deposition      Method      Prepared**  
**Graphene/polyaniline@carbon cloth Composite As High-performance Flexible**  
**Supercapacitor Electrodes**

By *Lele Wen,<sup>a</sup> Ke Li,<sup>b</sup> Jingjing Liu,<sup>b</sup> Yanshan Huang,<sup>b</sup> Fanxing Bu,<sup>b</sup> Yuxi Xu<sup>\*,b</sup> and*  
*Bin Zhao<sup>\*,a</sup>*

### **1. Morphologies of pure carbon cloth**

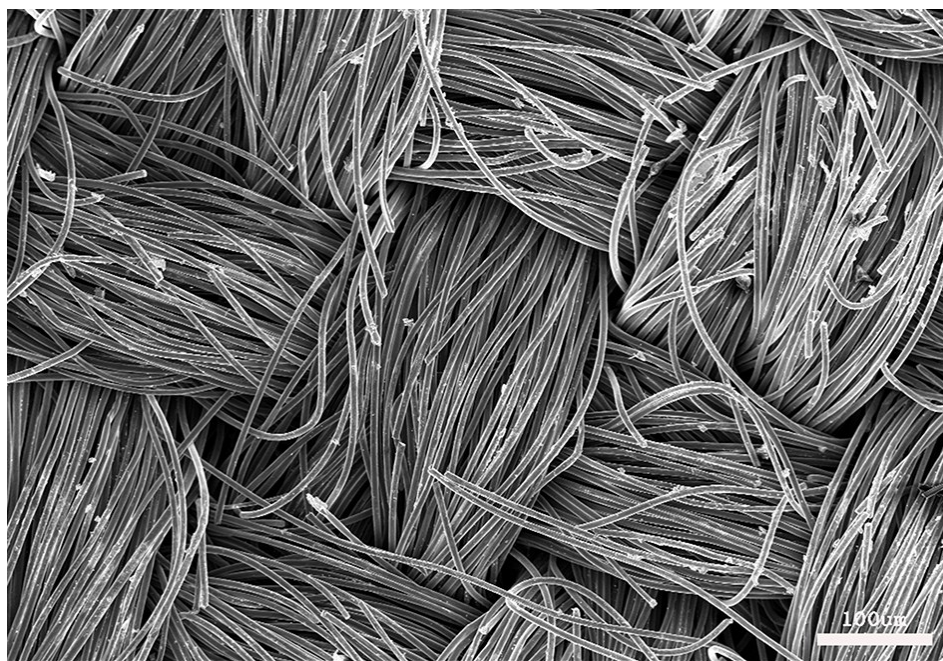

**Figure S1.** SEM images of pure carbon cloth.

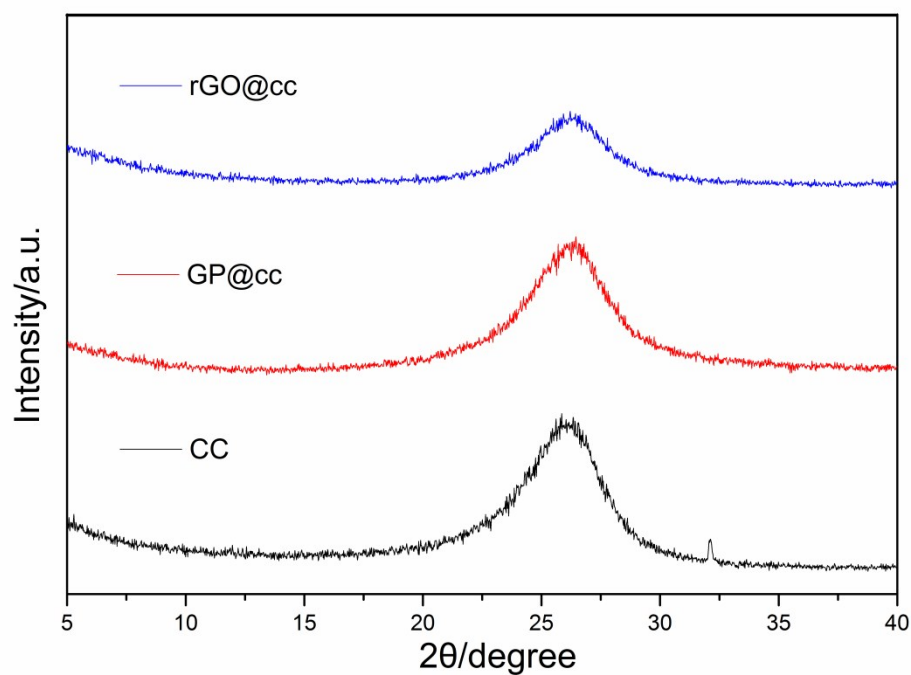

**Figure S2.** XRD patterns of the pure cc, RGO@cc and GP@cc composites.

## 2. Electrochemical performance of RGO@cc and PANI@cc

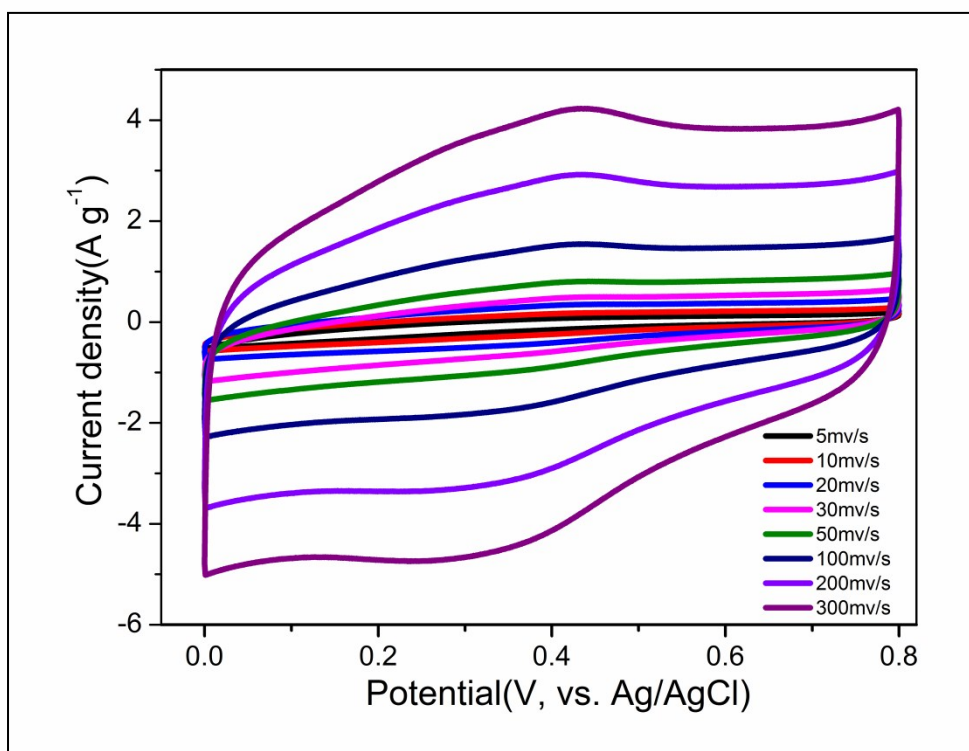

**Figure S3.** CV curves of RGO@cc composites at different scan rates.

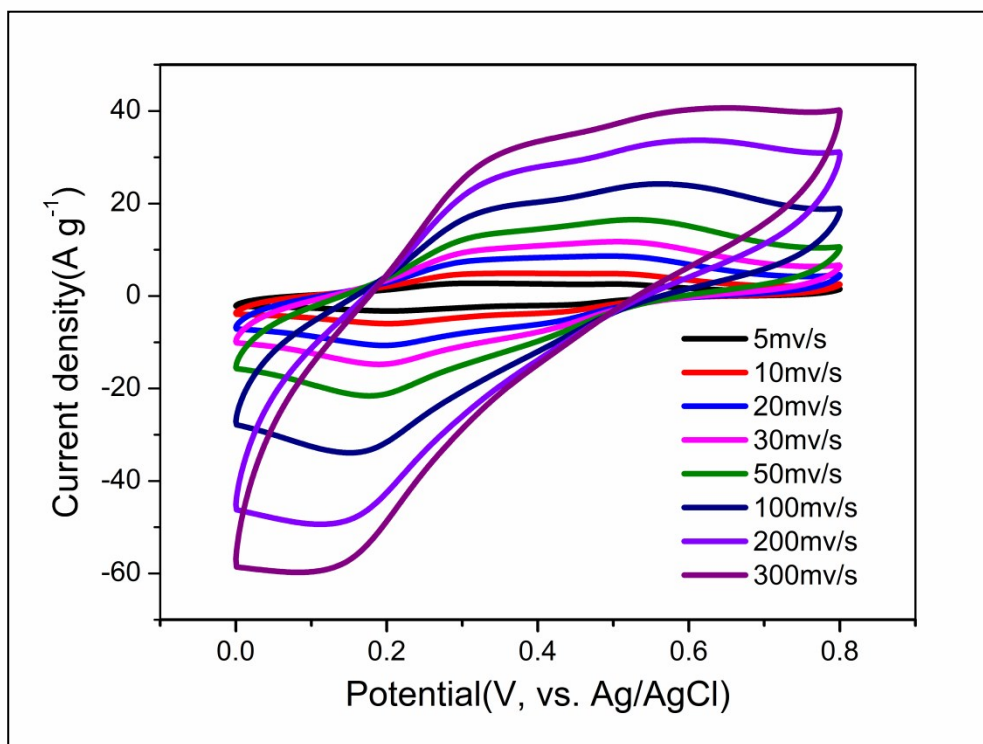

**Figure S4.** CV curves of PANI@cc composites at different scan rates.

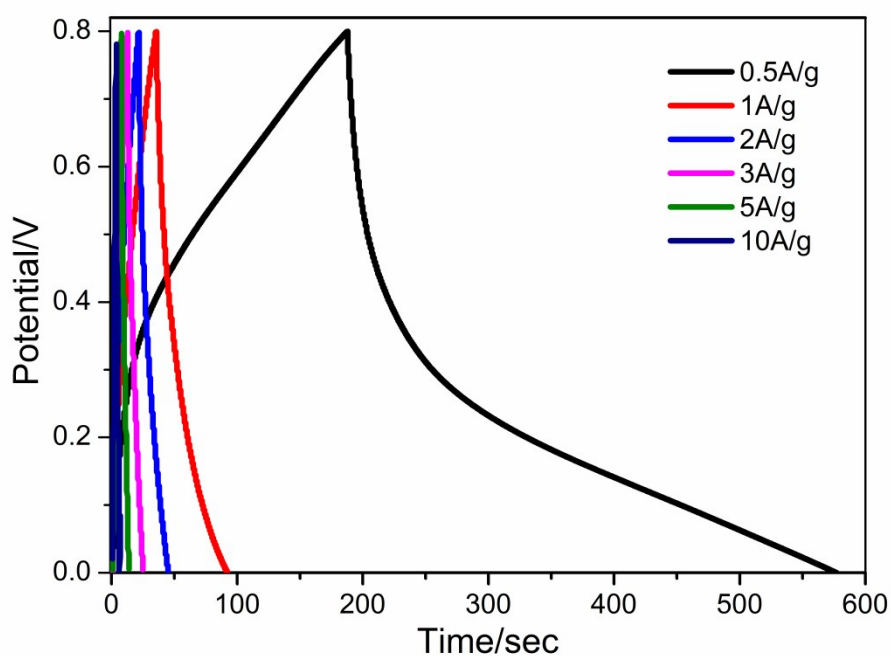

**Figure S5.** Galvanostatic charge-discharge curves of RGO@cc composites measured at different current densities.

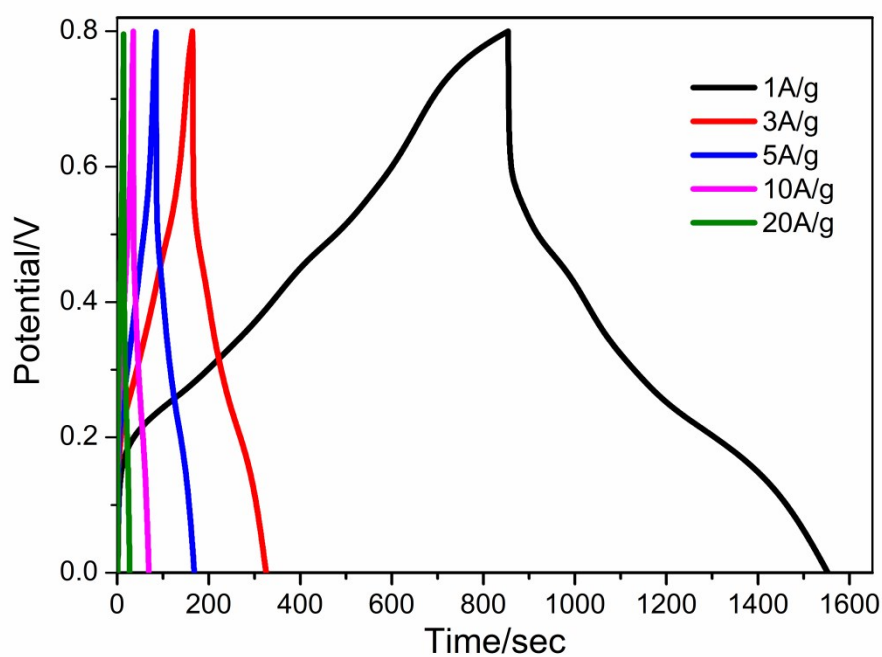

**Figure S6.** Galvanostatic charge-discharge curves of PANI@cc composites measured at different current densities.

The CV and GCD curves of RGO@cc and PANI@cc composites are both measured in 1 M  $\text{H}_2\text{SO}_4$  aqueous solution in a three-electrode system.

### 3. The digital picture of the flexible symmetric SC device.

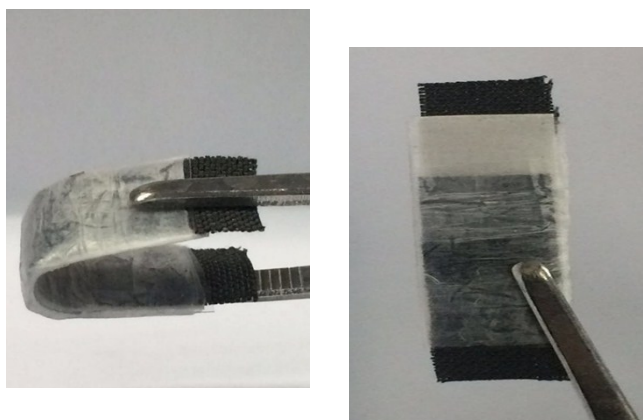

**Figure S7.** The digital picture of the flexible symmetric SC device.
